# Supplementary material
Source: Springer Nature journal article supplement (https://www.springermedizin.de/resource/supplementary/12906_2009_297_MOESM10_ESM.pdf/9519366)

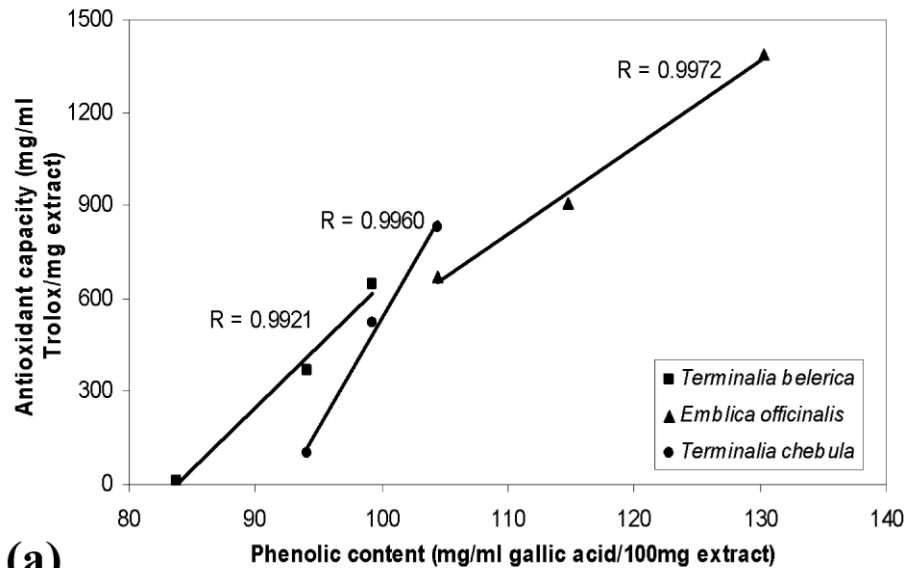

(a)

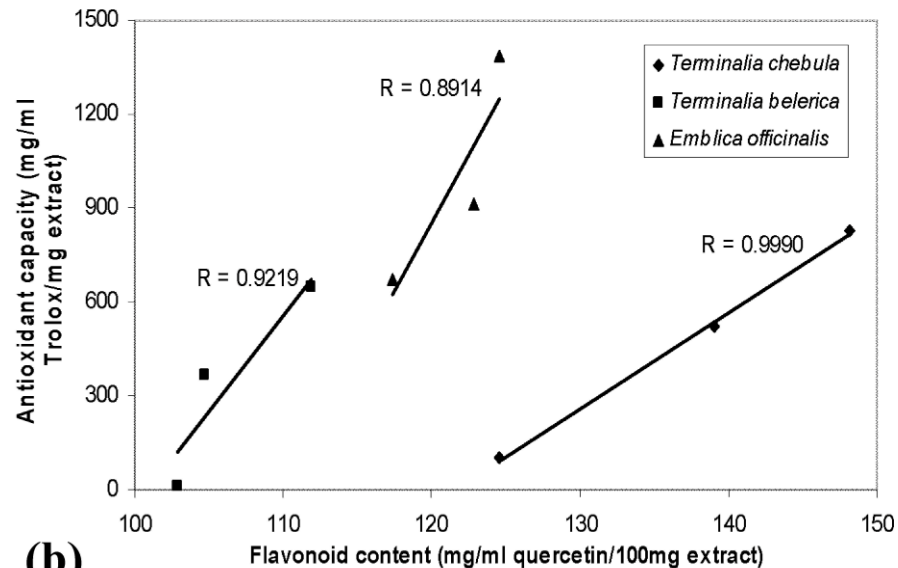

(b)

Supplement: MOESM10 [file 9519366]
